# Supplementary material for: A xanthene-based probe with dual reaction sites enables fluorescence turn-on detection of thiophenol in an aqueous medium
Source: Royal Society of Chemistry journal article supplement (doi:10.1039/d2nj05596a), 2023-01-01
Supplement: d2nj05596a1.pdf [file d2nj05596a1.pdf]

Electronic Supplementary Information

**A xanthene-based probe with dual reaction sites enables fluorescence turn-on detection of thiophenol in an aqueous medium**

Bhanu Priya,<sup>a</sup> Naresh Kumar,<sup>\*b</sup> Deepak Mishra<sup>b</sup> and Roopa<sup>\*a</sup>

<sup>a</sup>Department of Applied Sciences, I.K. Gujral Punjab Technical University, Kapurthala 144603  
Punjab, India

<sup>b</sup>Department of Chemistry, SRM University, Delhi-NCR, Sonapat-131029, Haryana, India

\* Corresponding authors.

E-mail addresses: [naresh.chem.ia@gmail.com](mailto:naresh.chem.ia@gmail.com) (N. Kumar); [dr.roopa@ptu.ac.in](mailto:dr.roopa@ptu.ac.in) (Roopa)

**Table S1.** Comparison of Xanth-NO<sub>2</sub> with various thiophenol selective fluorescent probes

| Probe Structure                                                                     | Solvent Conditions                                                          | Fluorescence based discrimination of PhSH and H <sub>2</sub> S | PhSH Detection Limit | Reference                                          |
|-------------------------------------------------------------------------------------|-----------------------------------------------------------------------------|----------------------------------------------------------------|----------------------|----------------------------------------------------|
| 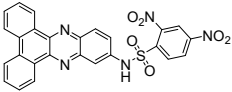   | PBS buffer/DMSO;<br>1 : 1, v/v<br>(50% DMSO)                                | -                                                              | 0.04 μM              | <i>RSC Adv.</i> ,<br>2022, 12, 8611                |
|    | PBS buffer/DMF;<br>6 : 4, v/v<br>(40% DMF)                                  | -                                                              | 0.12 μM              | <i>RSC Adv.</i> ,<br>2015, 5,<br>94216             |
|    | PBS buffer/THF;<br>9:1, v/v<br>(10% THF)                                    | -                                                              | 0.0094 μM            | <i>Org. Biomol. Chem.</i> , 2019,<br>17, 9251      |
|    | PBS buffer/DMSO;<br>1 : 1, v/v<br>(50% DMSO)                                | -                                                              | 0.120 μM             | <i>New J. Chem.</i> ,<br>2020, 44,<br>17360        |
|   | HEPES<br>buffer/DMSO;<br>1 : 1, v/v<br>(50% DMSO)                           | -                                                              | 0.037 μM             | <i>Talanta</i> , 2018,<br>181, 239                 |
|  | PBS buffer/DMSO;<br>1 : 1, v/v<br>(50% DMSO)                                | -                                                              | 0.034 μM             | <i>Environ. Pollut.</i> , 2020,<br>265, 114958     |
|  | PBS buffer/DMF;<br>9 : 1, v/v<br>(10% DMF)                                  | -                                                              | 0.038 μM             | <i>ACS Omega</i> ,<br>2020, 5,<br>10808            |
|  | HEPES<br>buffer/DMSO;<br>7 : 3, v/v<br>(30% DMSO)                           | -                                                              | 0.015 μM             | <i>Chem. Commun.</i> ,<br>2021, 57,<br>2800        |
|  | PBS buffer/DMF;<br>3 : 1, v/v<br>(25% DMF)                                  | -                                                              | 0.0072 μM            | <i>Dye. Pigment.</i> ,<br>2021, 190,<br>109289     |
|  | HEPES<br>buffer/CH <sub>3</sub> CN<br>3 :1, v/v<br>(25% CH <sub>3</sub> CN) | -                                                              | 0.0369 μM            | <i>Sensors and Actuators B</i> ,<br>2017, 252, 470 |

--Continue

|                                                                                     |                                                                                          |                                                                                                                                                                                  |                                      |                                                  |
|-------------------------------------------------------------------------------------|------------------------------------------------------------------------------------------|----------------------------------------------------------------------------------------------------------------------------------------------------------------------------------|--------------------------------------|--------------------------------------------------|
| 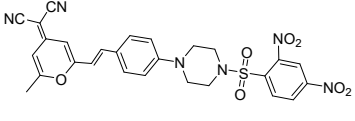   | HEPES<br>buffer/DMSO;<br>7 : 3, v/v<br>(30% DMSO)                                        | -                                                                                                                                                                                | 0.0083 $\mu\text{M}$                 | <i>Analyst</i> , 2018,<br>143, 756               |
|    | PBS<br>buffer/ $\text{CH}_3\text{CN}$ ;<br>1 : 1, v/v<br>(50% $\text{CH}_3\text{CN}$ )   | -                                                                                                                                                                                | 0.189 $\mu\text{M}$                  | <i>Anal. Methods</i> ,<br>2016, 8, 1425          |
|    | PBS<br>buffer/ $\text{CH}_3\text{CN}$ ;<br>1 : 1, v/v<br>(50% $\text{CH}_3\text{CN}$ )   | -                                                                                                                                                                                | 0.007 $\mu\text{M}$                  | <i>RSC Adv.</i> ,<br>2017, 7, 46148              |
|    | 45% DMF in PBS<br>buffer                                                                 | -                                                                                                                                                                                | 0.03 $\mu\text{M}$                   | <i>RSC Adv.</i> ,<br>2016, 6, 52790              |
|    | PBS buffer/DMF;<br>8 : 2, v/v<br>(20% DMF)                                               | -                                                                                                                                                                                | 0.009 $\mu\text{M}$                  | <i>New J. Chem.</i> ,<br>2019, 43, 14139         |
|   | HEPES<br>buffer/ $\text{CH}_3\text{CN}$ ;<br>1 : 1, v/v<br>(50% $\text{CH}_3\text{CN}$ ) | -                                                                                                                                                                                | 0.0038 $\mu\text{M}$                 | <i>Analytical Chemistry</i> ,<br>2019, 91, 1353  |
|  | <b>Phosphate buffer</b>                                                                  | -                                                                                                                                                                                | <b>20 <math>\mu\text{M}</math></b>   | <i>Angew. Chem. Int. Ed.</i> , 2007,<br>46, 8445 |
|  | <b>Phosphate buffer</b>                                                                  | -                                                                                                                                                                                | <b>0.2 <math>\mu\text{M}</math></b>  | <i>Chem. Commun.</i> ,<br>2010, 46, 1944         |
|  | PBS<br>buffer/ $\text{CH}_3\text{CN}$ ;<br>7 : 3, v/v<br>(30% $\text{CH}_3\text{CN}$ )   | The probe exhibits<br>similar reactivity for<br>$\text{H}_2\text{S}$ and glutathione,<br>making no clear<br>discrimination<br>between PhSH and<br>$\text{H}_2\text{S}$           | 0.34 $\mu\text{M}$                   | <i>ACS Sens.</i> ,<br>2018,<br>3, 1863           |
|  | <b>HEPES<br/>buffer/DMSO;<br/>9.75 : 0.25, v/v<br/>(2.5% DMSO)</b>                       | <b>Xanth-<math>\text{NO}_2</math> reacted<br/>differently with<br/>PhSH and <math>\text{H}_2\text{S}</math>,<br/>allowing to<br/>distinguish between<br/>these two analytes.</b> | <b>0.13 <math>\mu\text{M}</math></b> | <b>This Work</b>                                 |

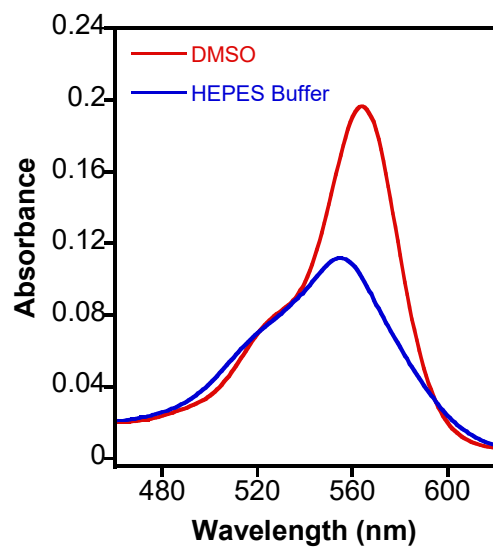

Fig. S1: Absorption spectra of Xanth-NO<sub>2</sub> (5 μM) in DMSO and HEPES buffer (pH 7.4) containing 2.5% DMSO.

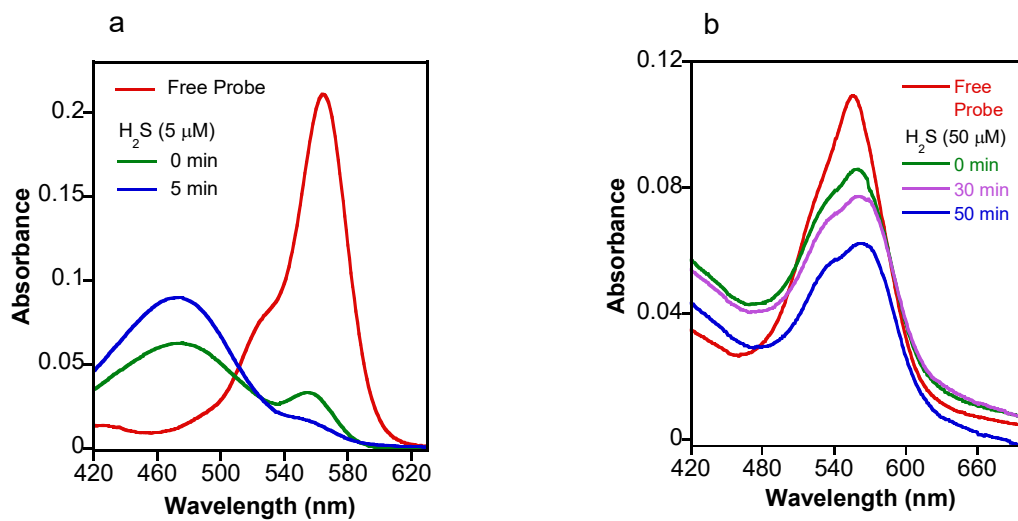

Fig. S2: Absorption spectra of Xanth-NO<sub>2</sub> (5 μM) with H<sub>2</sub>S as Na<sub>2</sub>S in: (a) DMSO and (b) HEPES buffer (pH 7.4) containing 2.5% DMSO.

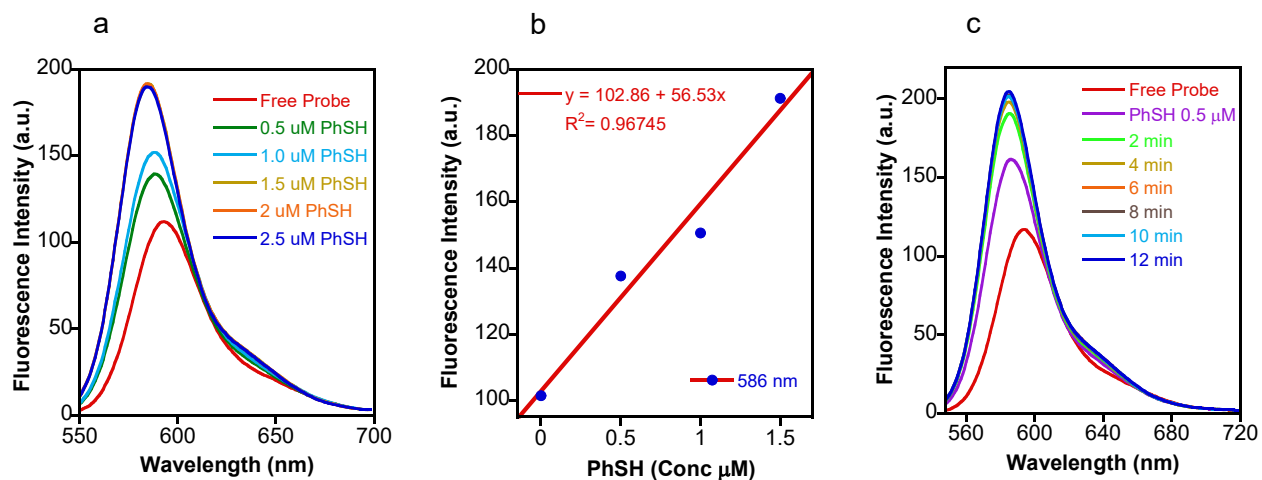

Fig. S3: (a) Fluorescence response of Xanth-NO<sub>2</sub> (5 μM) with increasing concentrations of PhSH. (b) Plot of a linear relationship between the fluorescence intensity at 586 nm and the concentration of PhSH. (c) Time-dependent fluorescence change of Xanth-NO<sub>2</sub> in the presence of PhSH. The experiments were performed in DMSO at 25 °C,  $\lambda_{\text{ex}} = 540 \text{ nm}$ .

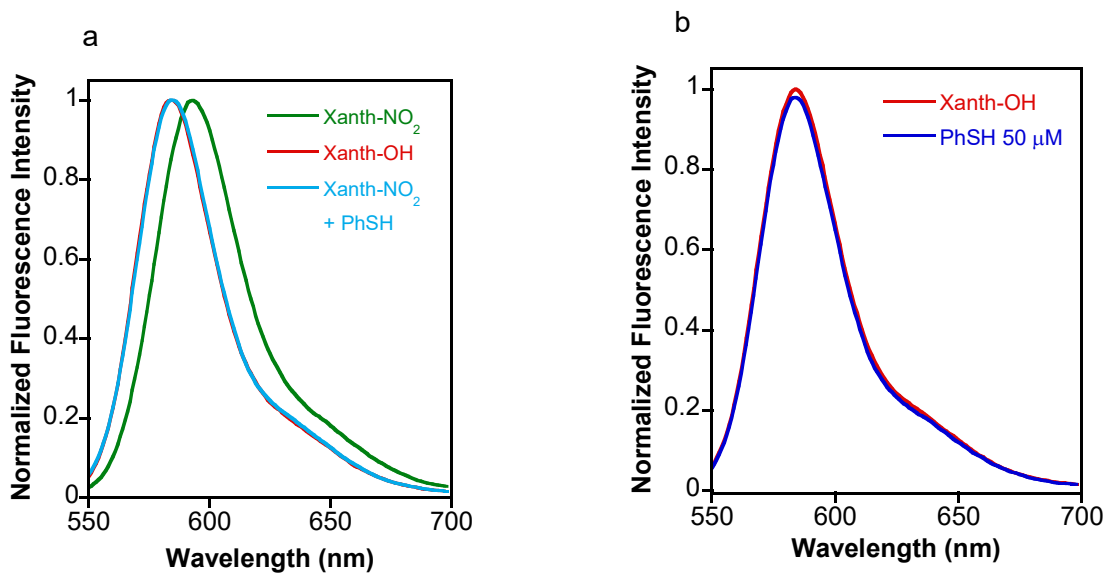

Fig. S4: Normalized fluorescence of: (a) Xanth-NO<sub>2</sub>, Xanth-OH and Xanth-NO<sub>2</sub> + PhSH; (b) Xanth-OH with and without PhSH. Conditions: Solvent: DMSO, 25 °C,  $\lambda_{\text{ex}} = 540 \text{ nm}$ .

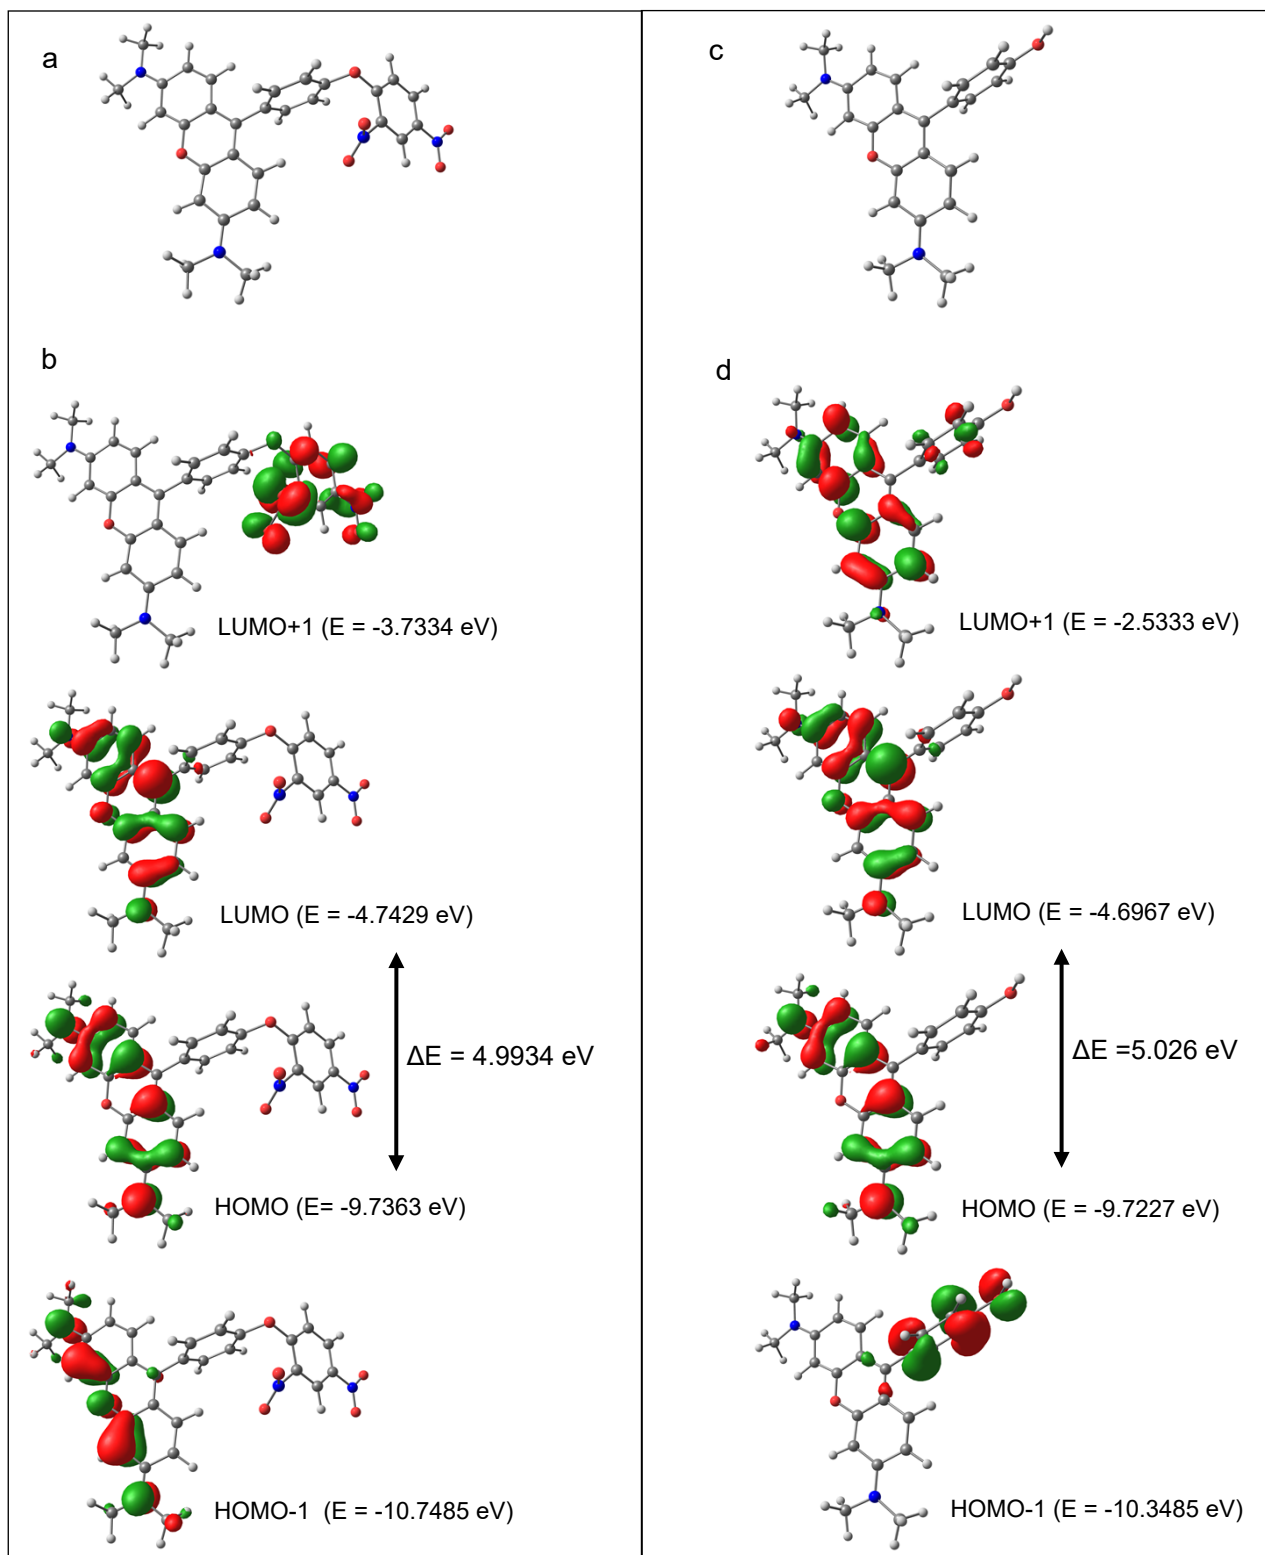

Fig. S5: Optimized structures of Xanth-NO<sub>2</sub> (a) and Xanth-OH (c). Molecular orbitals and energies of Xanth-NO<sub>2</sub> (b) and Xanth-OH (d) using gas phase TD-DFT calculations based on the CAMB3LYP/TZV basis set level.

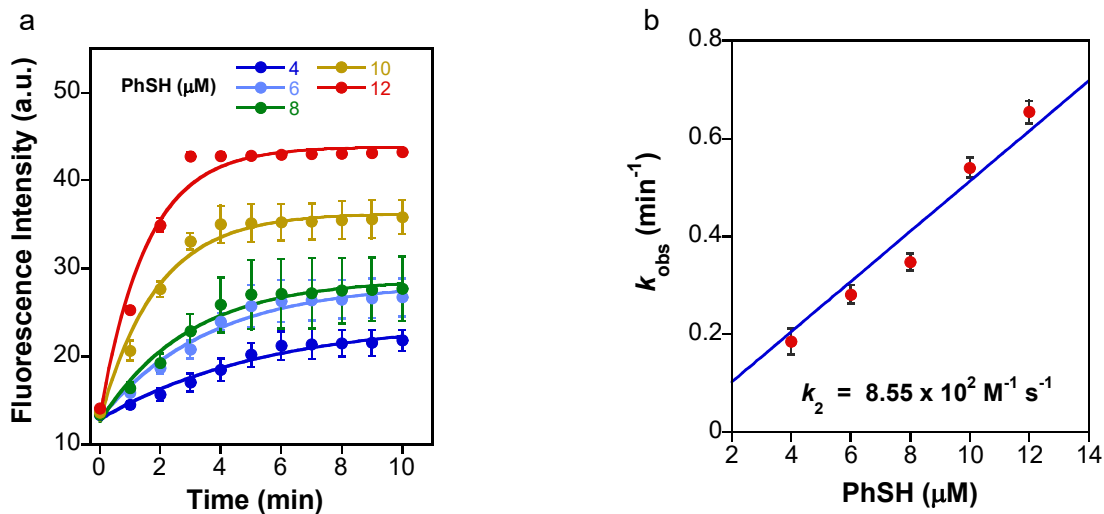

Fig. S6: Rate constant evaluation: (a) Time course of reaction of Xanth-NO<sub>2</sub> (0.2 μM) using different concentrations of PhSH in HEPES buffer (pH 7.4) containing 2.5% DMSO at 25 °C;  $\lambda_{ex/em}$  540/571 nm. (b) Plot of observed rate constant ( $k_{obs}$ ) as a function of PhSH concentrations. Error bars denote the standard deviation, SD, and  $n = 3$ .

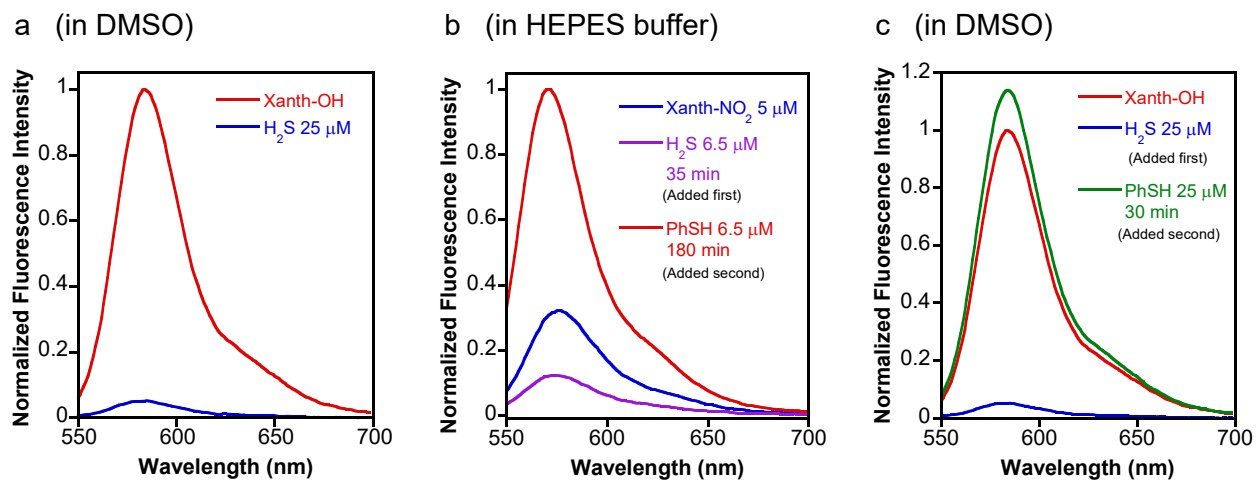

Fig. S7: Normalized fluorescence intensity of: (a) Xanth-OH with and without H<sub>2</sub>S; (b) Xanth-NO<sub>2</sub> and (c) Xanth-OH upon sequential addition of H<sub>2</sub>S and PhSH. For a and c, data reported in DMSO, 25 °C;  $\lambda_{ex}$  540 nm; For b, data reported in HEPES buffer (pH 7.4) containing 2.5% DMSO at 25 °C,  $\lambda_{ex} = 540$  nm.

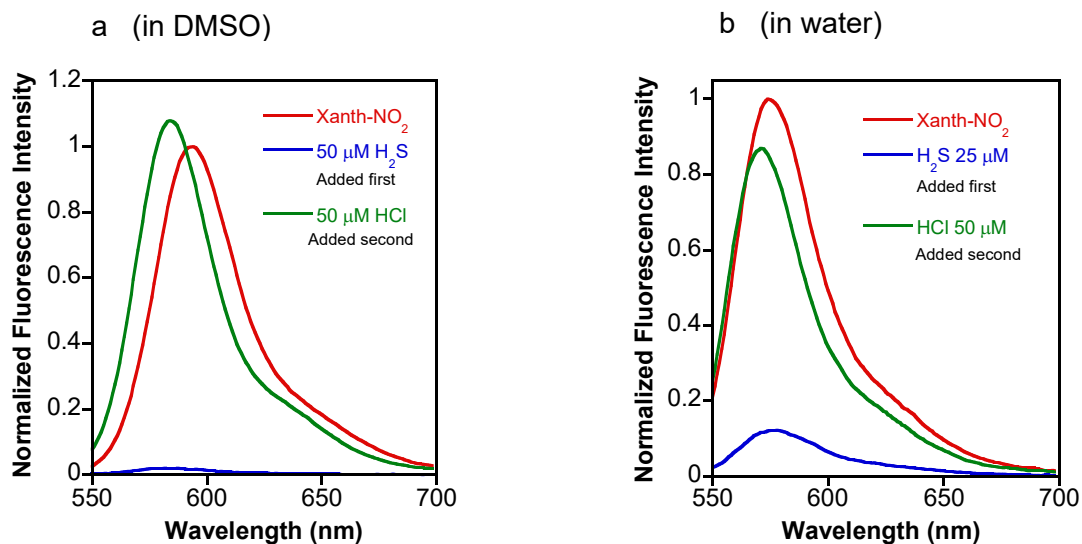

Fig. S8: Normalized fluorescence intensity of Xanth-NO<sub>2</sub> upon sequential addition of H<sub>2</sub>S and HCl. (a) In DMSO; (b) In water containing 2.5% DMSO. Data reported at 25 °C;  $\lambda_{\text{ex}}$  540 nm.

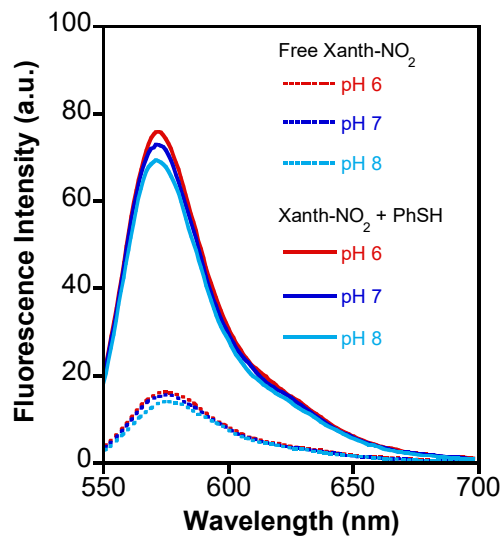

Fig. S9: Fluorescence profile of Xanth-NO<sub>2</sub> (5 μM) without or with PhSH (10 μM) under different pH environments. The pH was adjusted by adding aqueous NaOH or HCl. Data reported immediately after the addition of PhSH in water containing 2.5% DMSO at 25 °C;  $\lambda_{\text{ex}}$  540 nm.



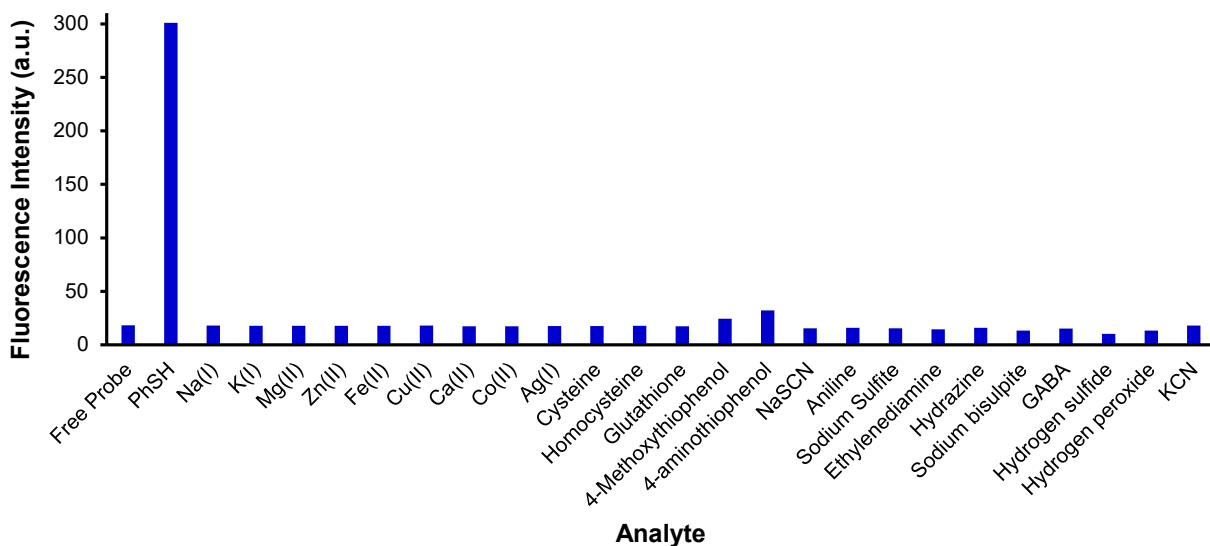

Fig. S10: Selectivity profile of Xanth-NO<sub>2</sub> (5 μM) with different analytes (20 μM in each case). Data reported after 5 min of addition in HEPES buffer (pH 7.4) containing 2.5% DMSO at 25 °C; λ<sub>ex/em</sub> 540 nm/571 nm.

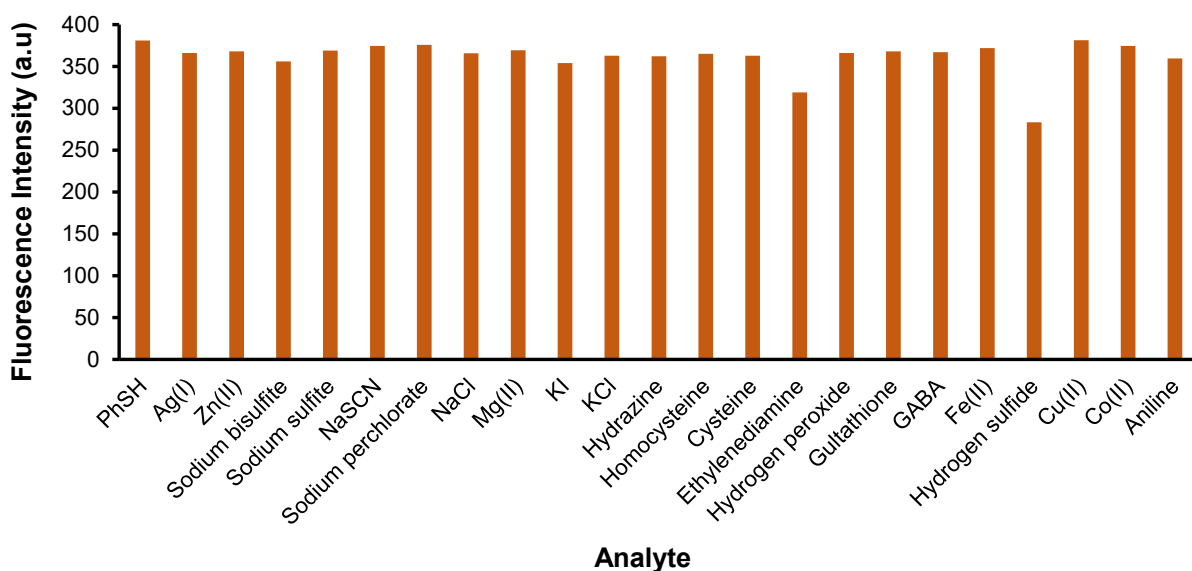

Fig. S11: Competitive selectivity profile of Xanth-NO<sub>2</sub> (5 μM) for PhSH in presence of different analytes. Data reported after 10 min of addition in HEPES buffer (pH 7.4) containing 2.5% DMSO at 25 °C; λ<sub>ex/em</sub> 540 nm/571 nm.

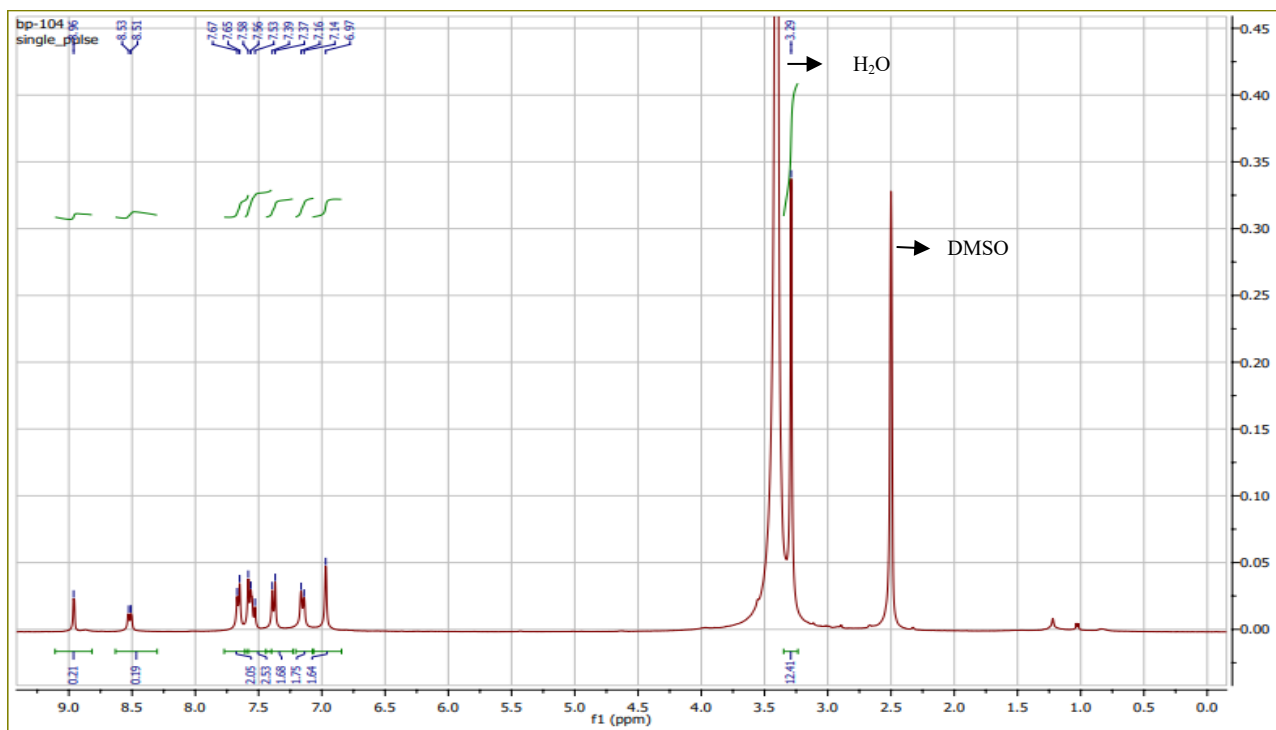

Fig. S12: <sup>1</sup>H NMR spectrum of compound Xanth-NO<sub>2</sub> in DMSO-*d*<sub>6</sub>.

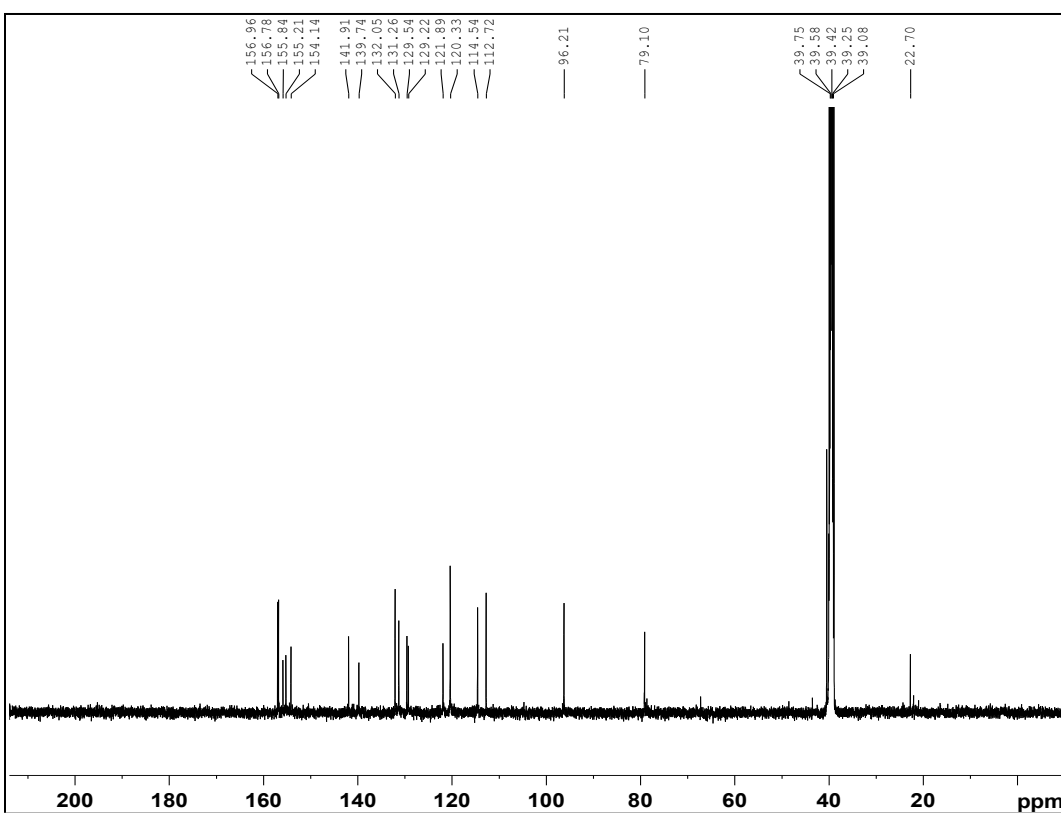

Fig. S13: <sup>13</sup>C NMR spectrum of compound Xanth-NO<sub>2</sub> in DMSO-*d*<sub>6</sub>.

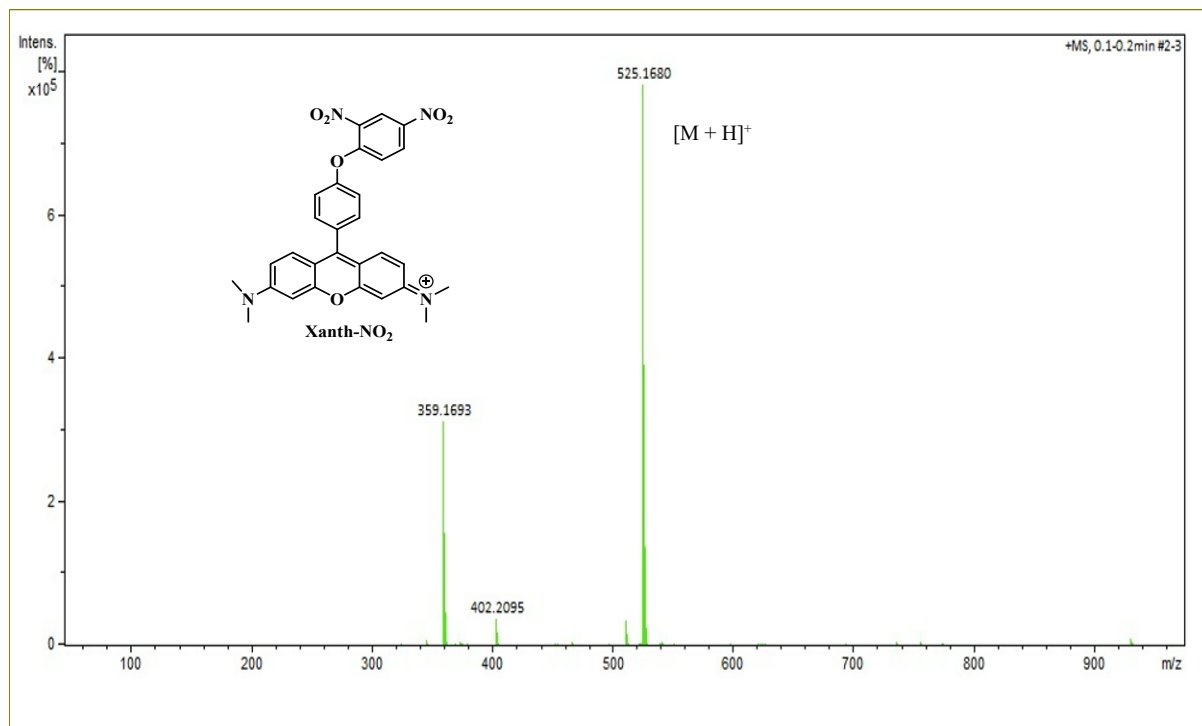

Fig. S14: HRMS spectrum of compound Xanth-NO<sub>2</sub>.

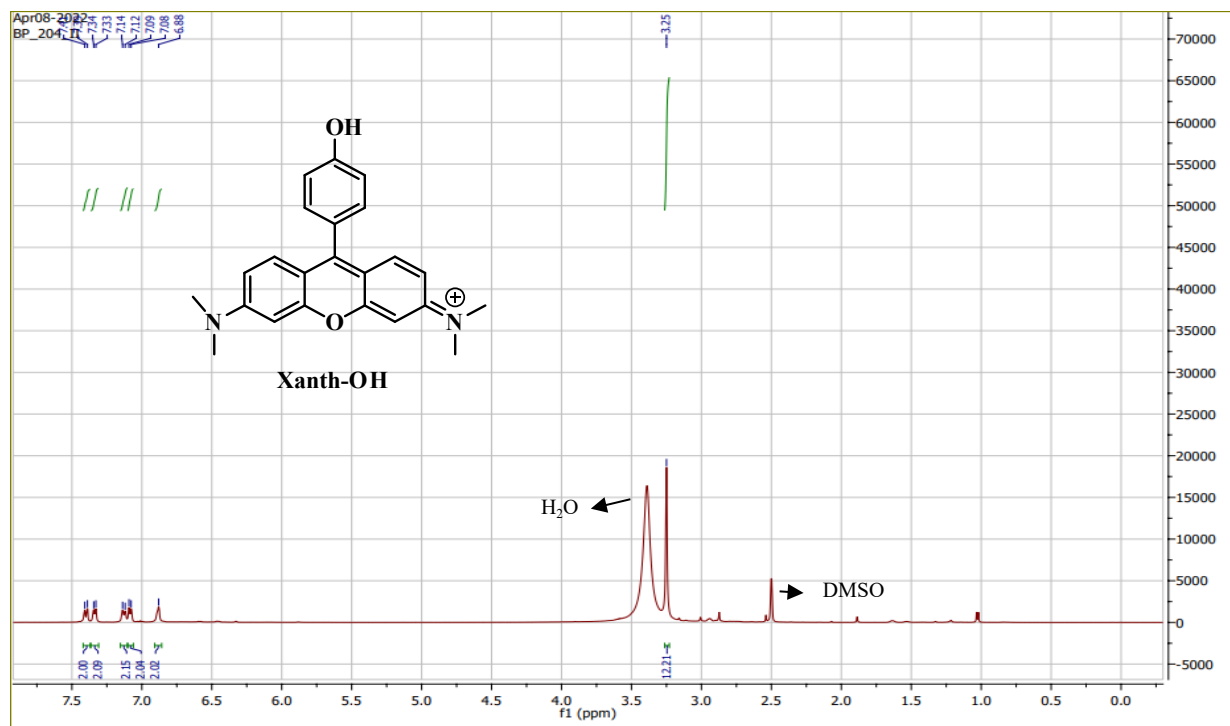

Fig. S15: <sup>1</sup>H NMR spectrum of compound Xanth-OH in DMSO-*d*<sub>6</sub>

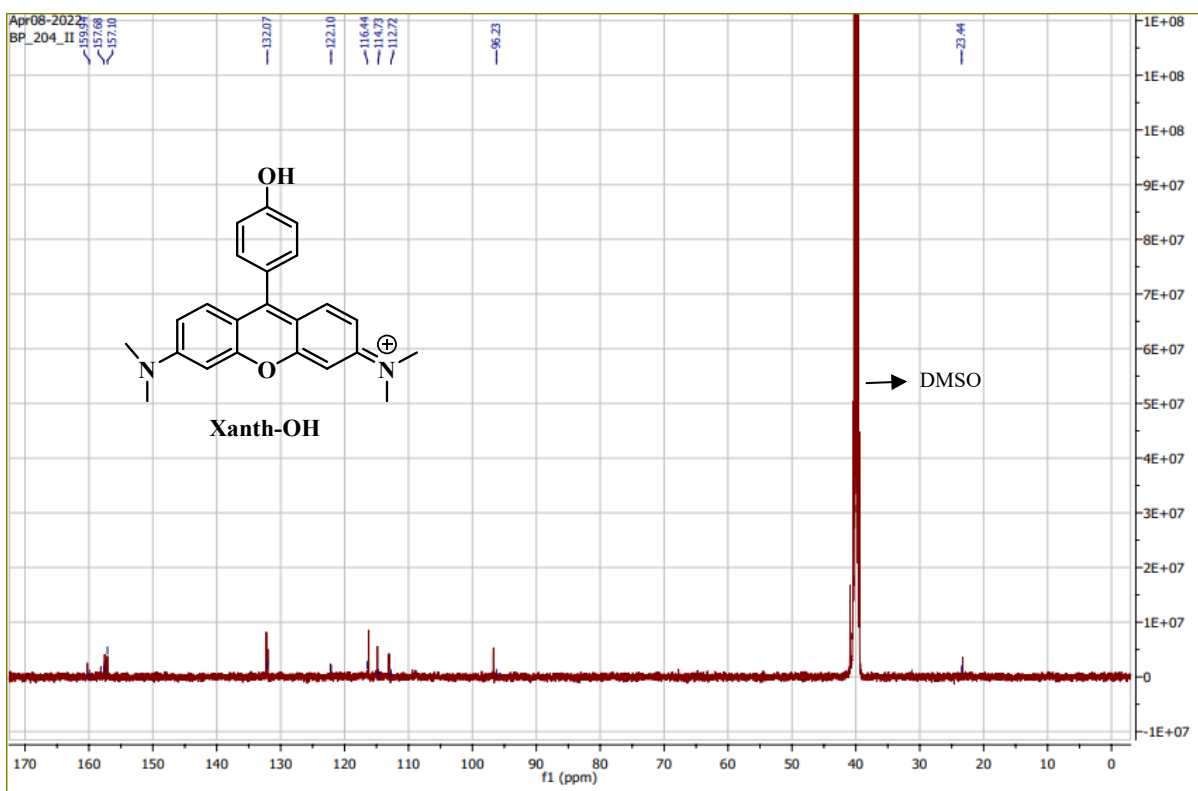

Fig. S16:  $^{13}\text{C}$  spectrum of compound Xanth-OH in  $\text{DMSO-}d_6$ .

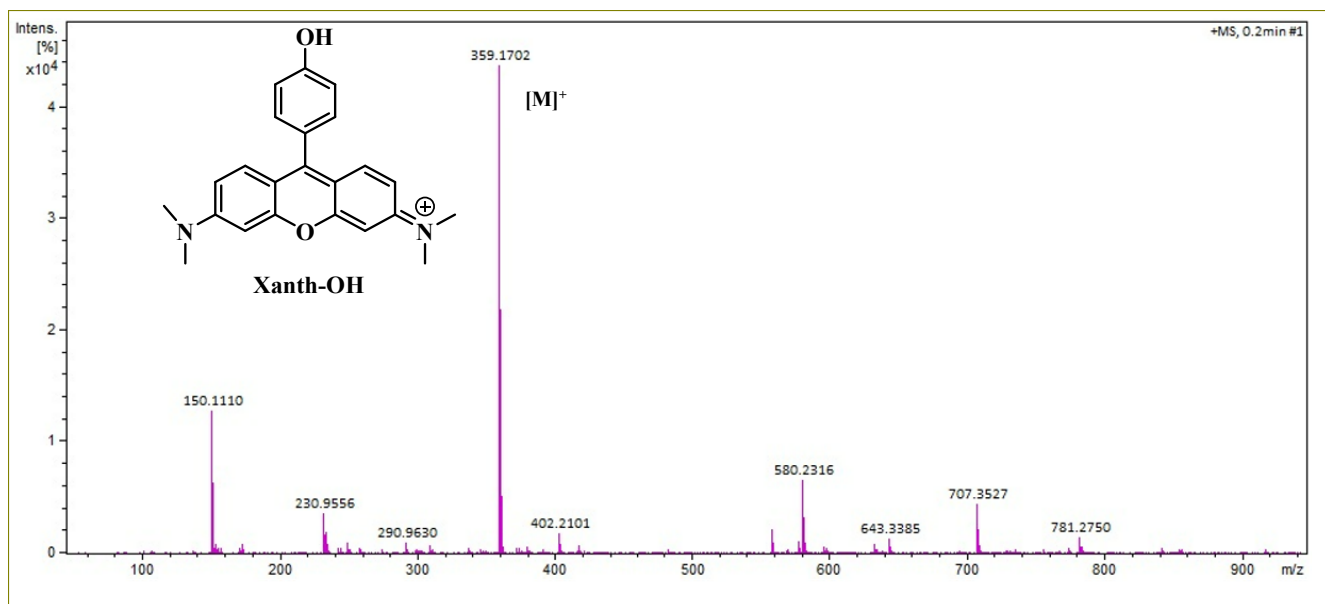

Fig. S17: HRMS spectrum of compound Xanth-OH.

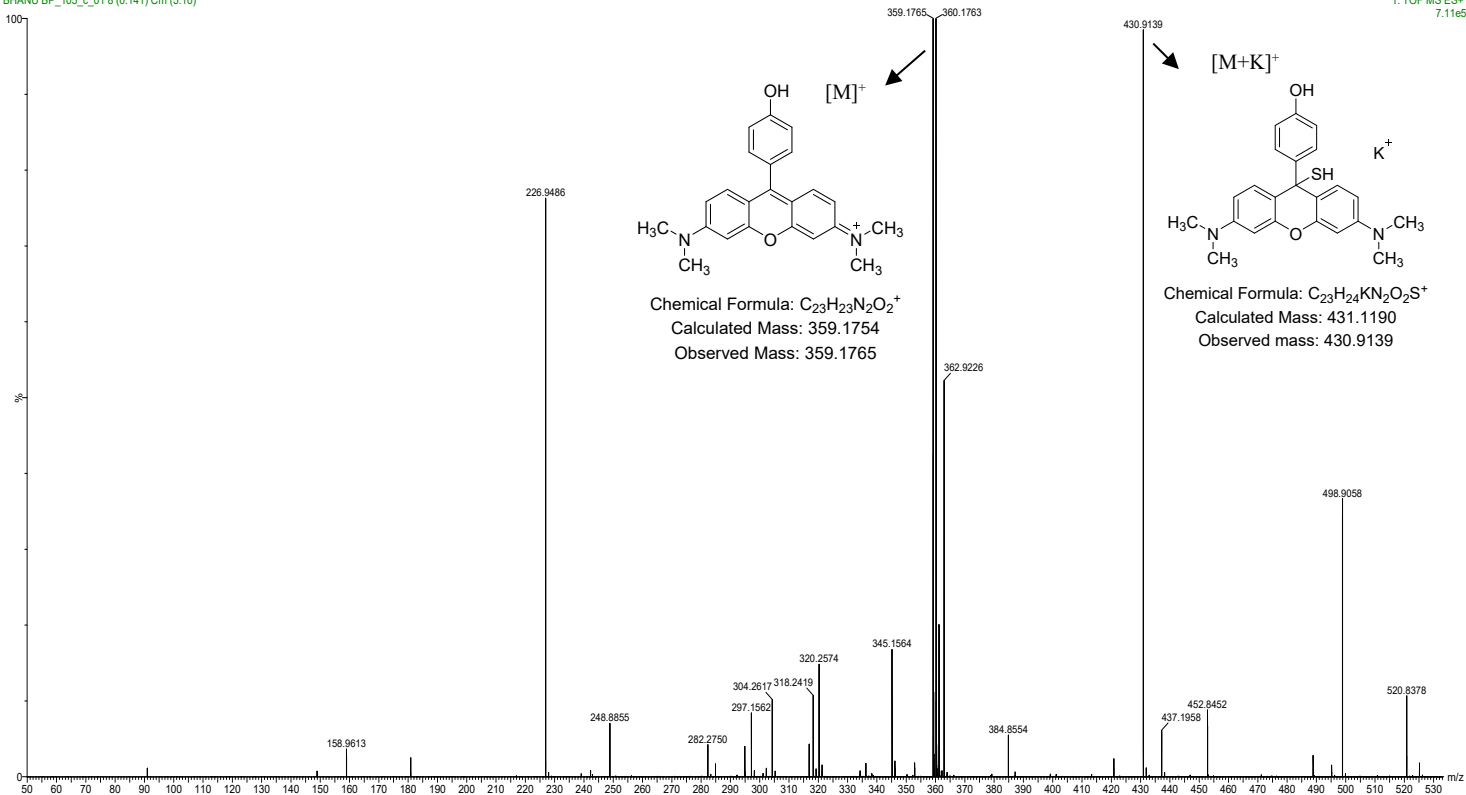

Fig. S18: Mass spectrum of compound Xanth-NO<sub>2</sub> in the presence of H<sub>2</sub>S.

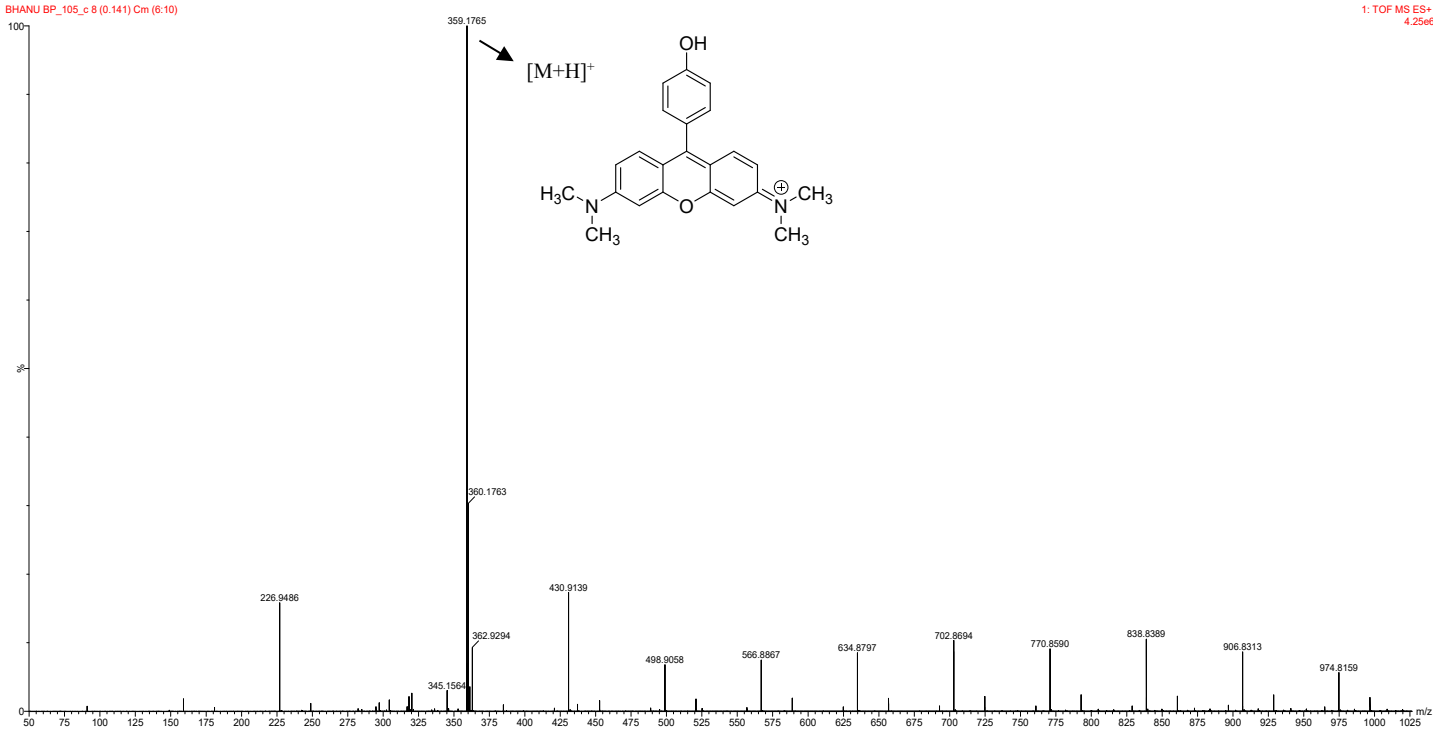

Fig. S19: Mass spectrum of compound Xanth-NO<sub>2</sub> with the addition of PhSH.

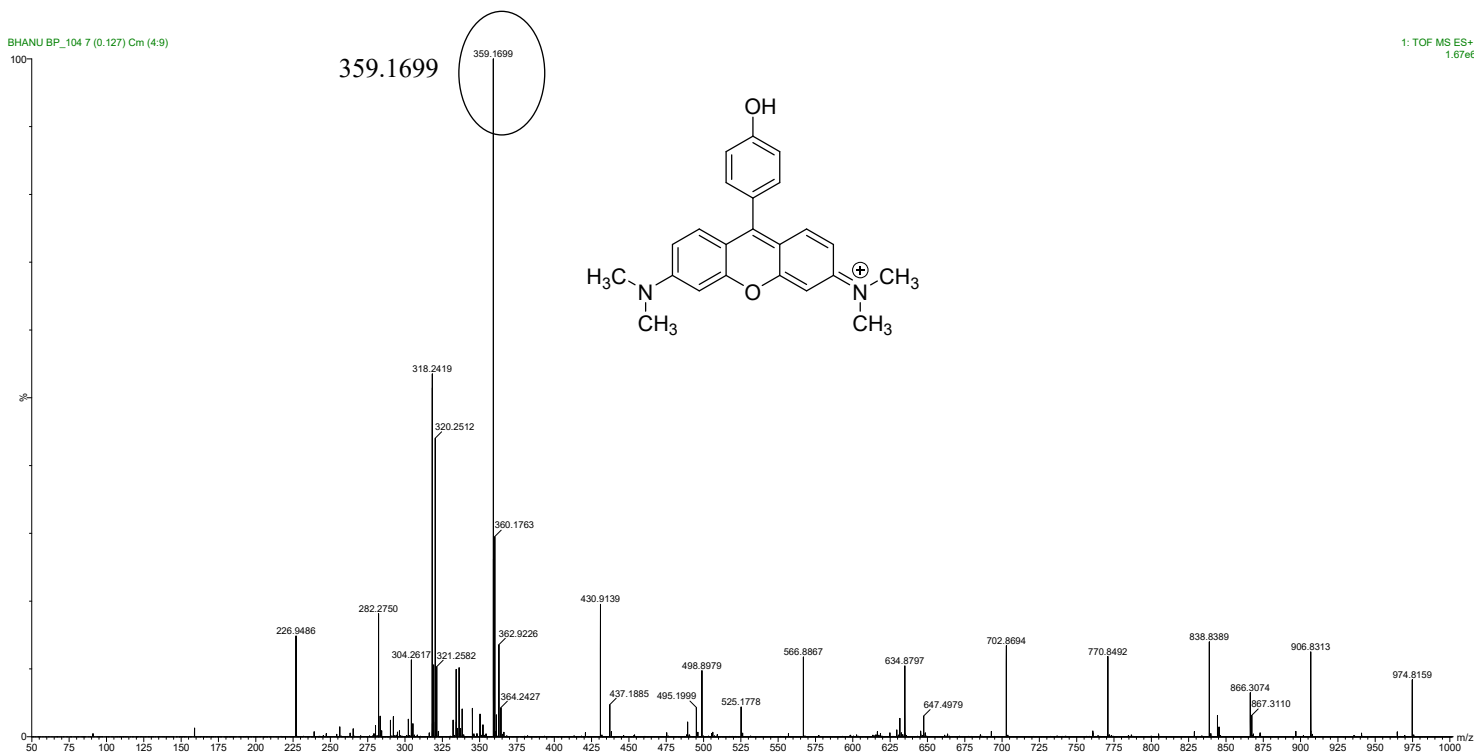

Fig. S20: Mass spectrum of compound Xanth-NO<sub>2</sub> with the addition of H<sub>2</sub>S and further addition of PhSH.
